# Supplementary material
Source: Springer Nature journal article supplement (https://www.springermedizin.de/resource/supplementary/12893_2009_137_MOESM2_ESM.pdf/9513022)

Figure 2

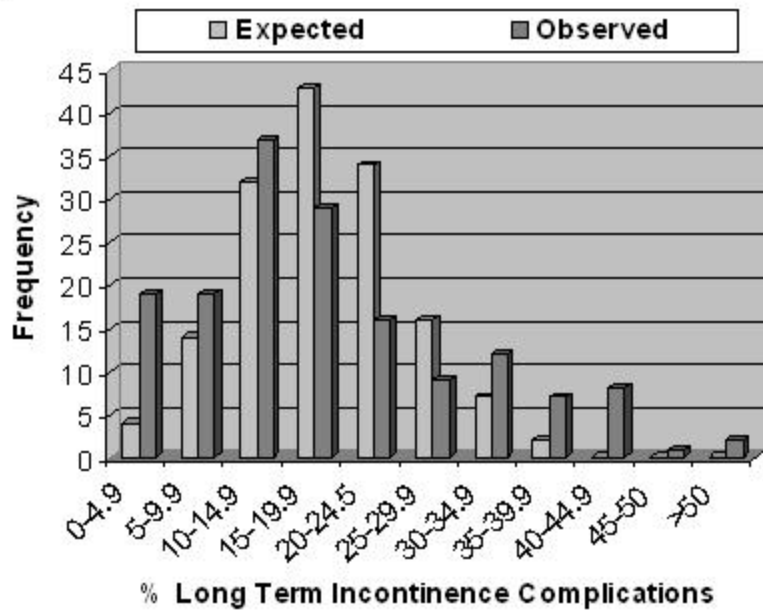

Supplement: MOESM2 [file 9513022]
